# Supplementary material for: Cyclophilin A induces macrophage apoptosis and enhances atherosclerotic lesions in high‐fat diet‐fed hyperglycemic rabbits
Source: PubMed Central journal article supplement — FASEB Bioadv. 2021 Mar 1;3(5):305–22. doi: 10.1096/fba.2020-00135 (PMC8103716; doi:10.1096/fba.2020-00135), 2021-03-01
Supplement: FBA2-3-305-s002.pdf [file FBA2-3-305-s002.pdf]

**Additional Figure 1: Cyclophilin A induced apoptosis - Annexin V FITC PI staining.** **a.** Time dependent assay **b.** Concentration dependent assay. **c.** Confocal images apoptotic cells treated with cyclophilin A (100, 150 & 300 ng/ml) using Annexin V FITC PI staining. **d.** DNA fragmentation assay after cyclophilin A treatment for 12 & 18H.

**Additional Figure 2: MitoSOX Red staining.** **a.** Confocal images of MitoSOX Red staining of cyclophilin A (100, 150 & 300ng/ml) treated macrophages **b.** FACS dot plot representing increased mitochondrial ROS production in cyclophilin A (100, 150 & 300ng/ml) treated cells.

**Additional Figure 3: TMRM staining** **a.** FACS analysis showing reduction of TMRM fluorescence (P2 population) indicating loss of mitochondrial membrane potential; **b.** Confocal assay. Cyclophilin A (100, 150 & 300ng/ml) treated cells were observed under a fluorescence microscope after staining with TMRM dye (red colour).

**Additional Figure 4: MPTP assay** **a.** Immunofluorescence assay revealing cyclophilin A (100, 150 & 300ng/ml) treatment of macrophages decreased the calcein AM retention ability (green colour) of mitochondria. **b.** Expression of Cytochrome C and caspase3 cleavage after cyclophilin A treatment in macrophages.
