# Supplementary figures and images for: Cyclophilin A induces macrophage apoptosis and enhances atherosclerotic lesions in high‐fat diet‐fed hyperglycemic rabbits
Source: PubMed Central journal article supplement — FASEB Bioadv. 2021 Mar 1;3(5):305–22. doi: 10.1096/fba.2020-00135 (PMC8103716; doi:10.1096/fba.2020-00135), 2021-03-01

**Additional Figure 3 : TMRM staining**

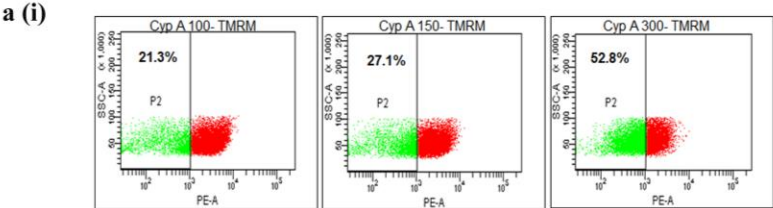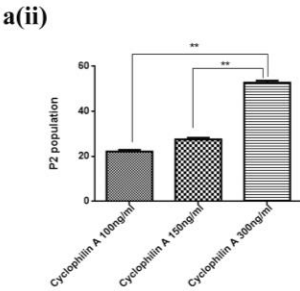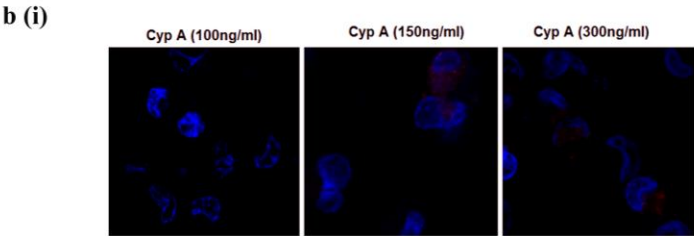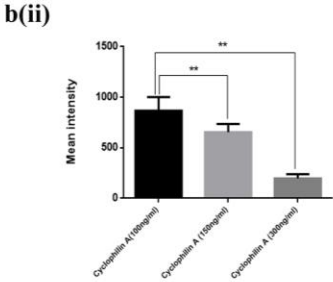

Supplement: FBA2-3-305-s001.pdf [file FBA2-3-305-s001.pdf]

# Additional Figure 1 : Cyclophilin A induced apoptosis

**a**

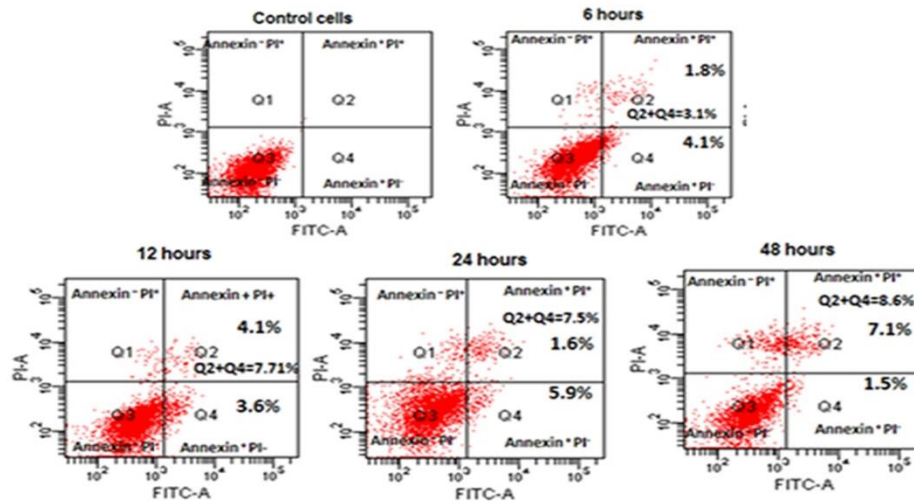

**b**

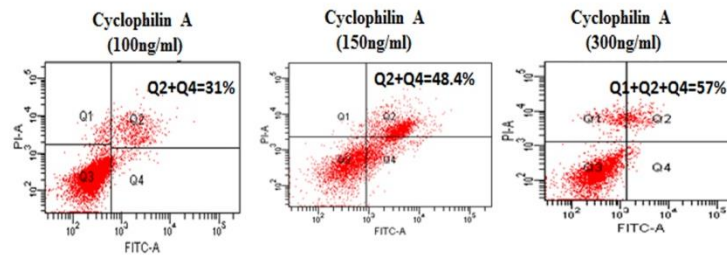

**c**

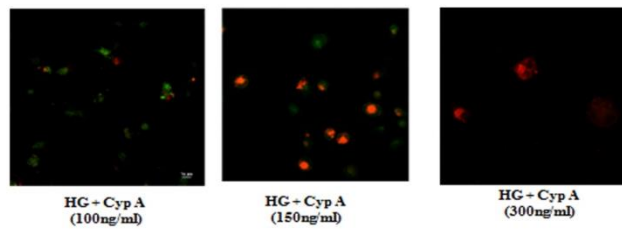

**d**

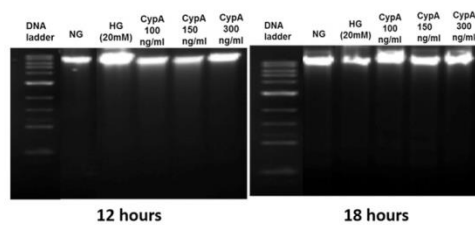

Supplement: FBA2-3-305-s003.pdf [file FBA2-3-305-s003.pdf]

## Additional Figure 4 : MPTP assay

a (i)

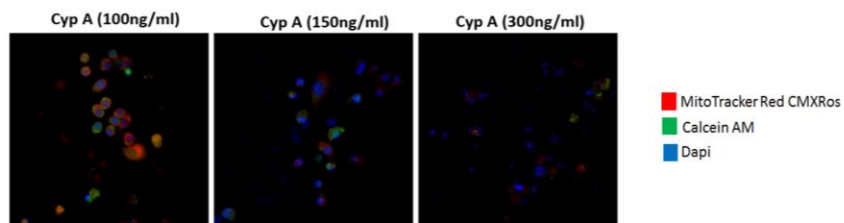

a (ii)

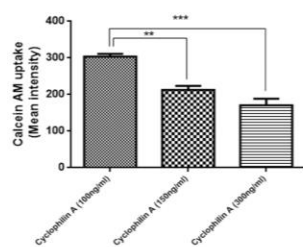

b

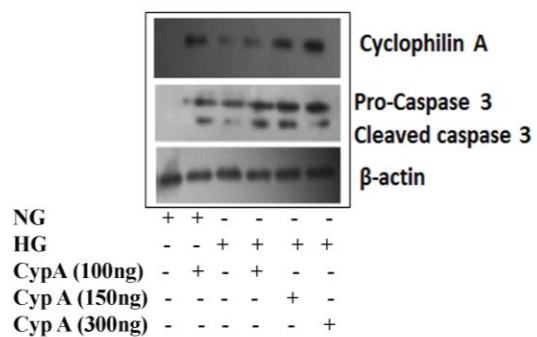

Supplement: FBA2-3-305-s004.pdf [file FBA2-3-305-s004.pdf]

**Additional Figure 2 : MitoSOX Red staining**

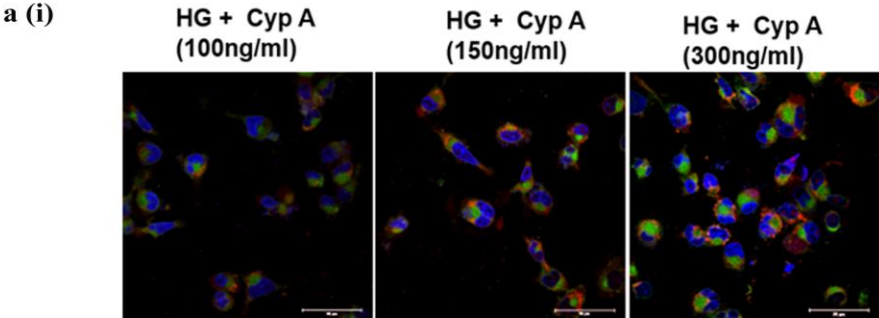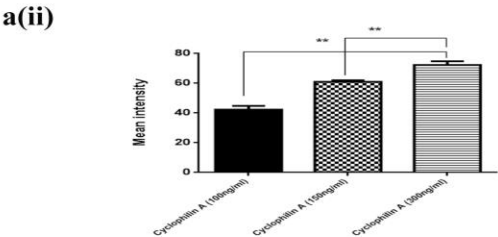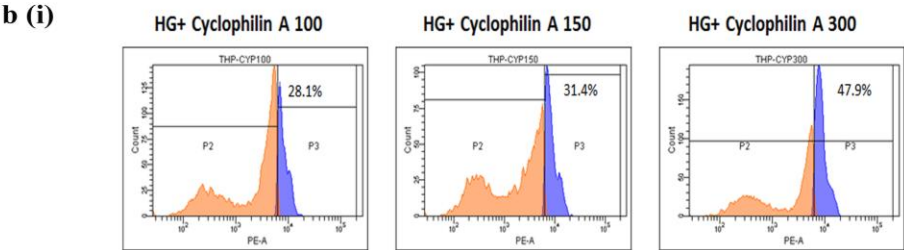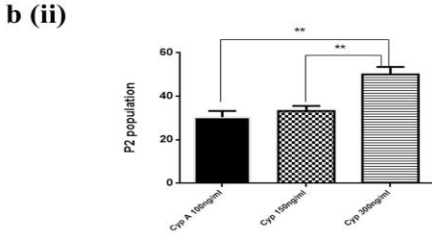

Supplement: FBA2-3-305-s005.pdf [file FBA2-3-305-s005.pdf]
